# Supplementary material
Source: PubMed Central journal article supplement (PMC6602070)
Supplement: NIHMS1530218-supplement-Supplementary_Info.pdf [file NIHMS1530218-supplement-Supplementary_Info.pdf]

*Apns-1:*

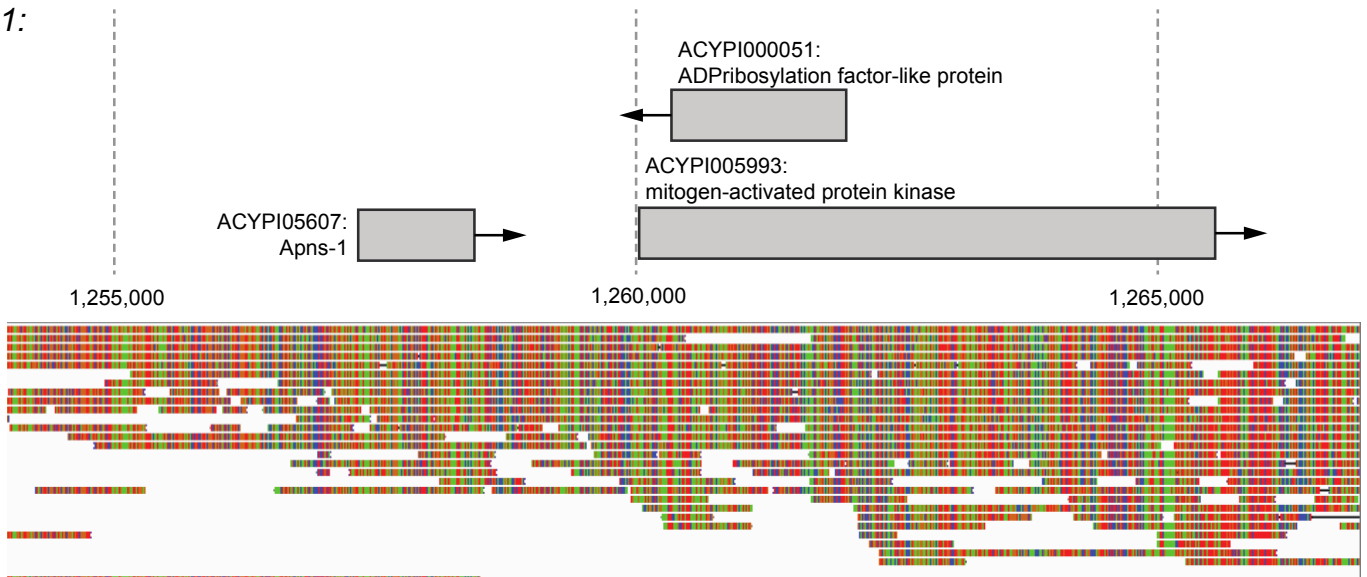

*Apns-2:*

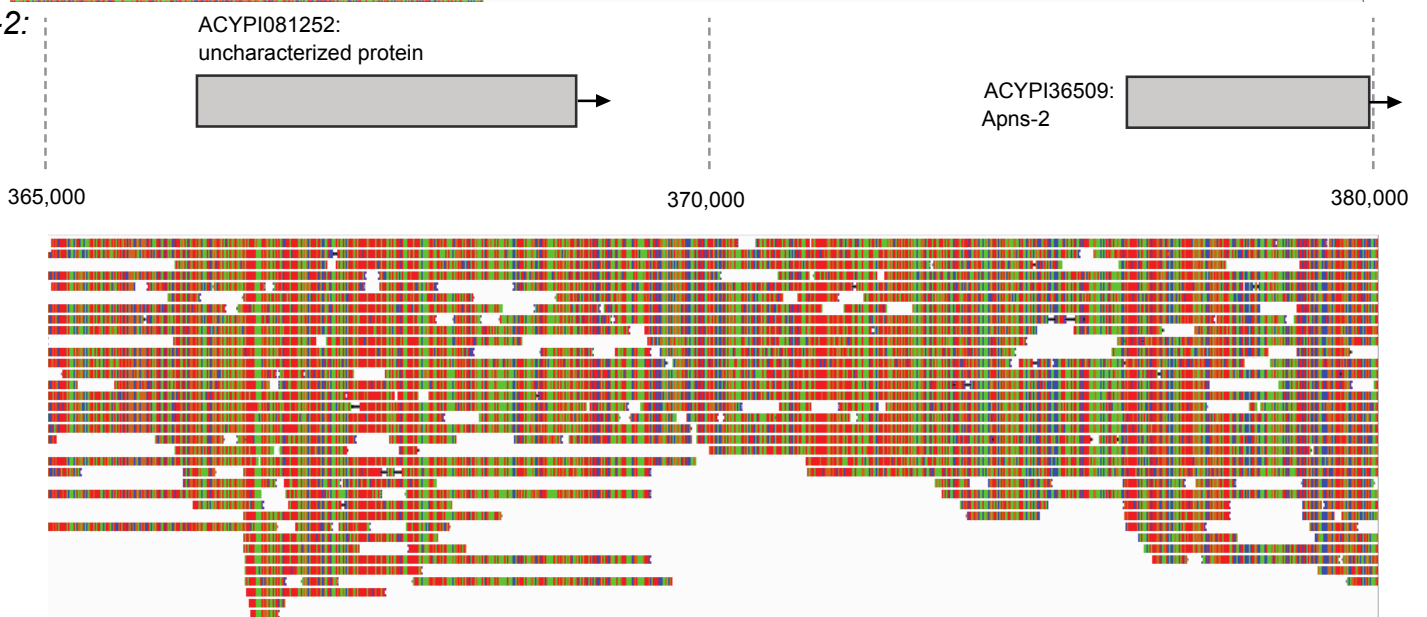

**Figure S1: *Apns* genes and gene regions based on nanopore reads. Related to Figures 2A&B.** The two densovirus genes are shown in the middle of each figure, each represented by a grey box. Nearby genes are shown to the right or left of the *Apns* genes also shown with grey boxes, with their associated directionality, gene ID (ACYPI) number, and annotation shown. The bottom of each figure shows individual long nanopore reads, with nucleotides represented by different colors.

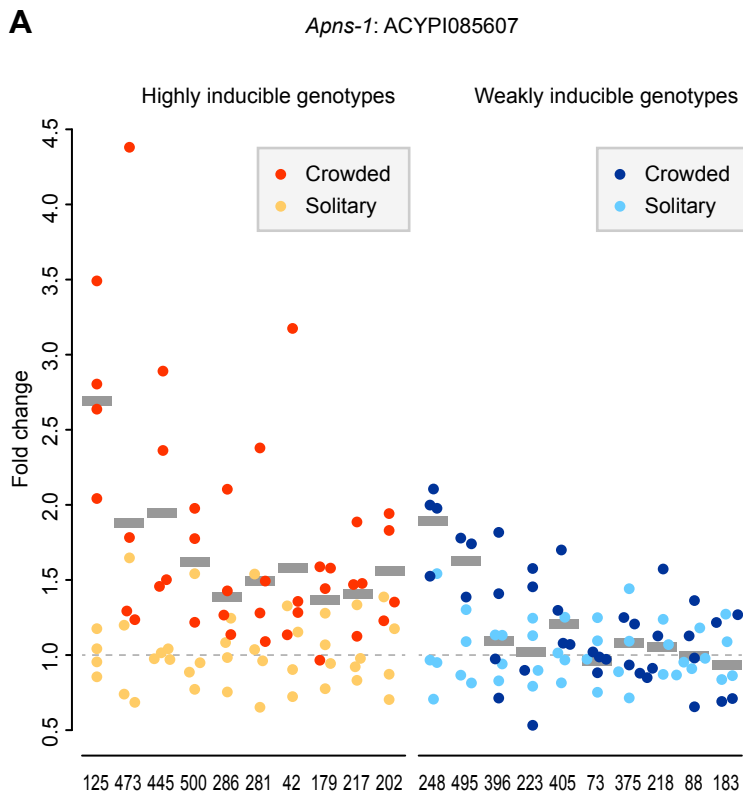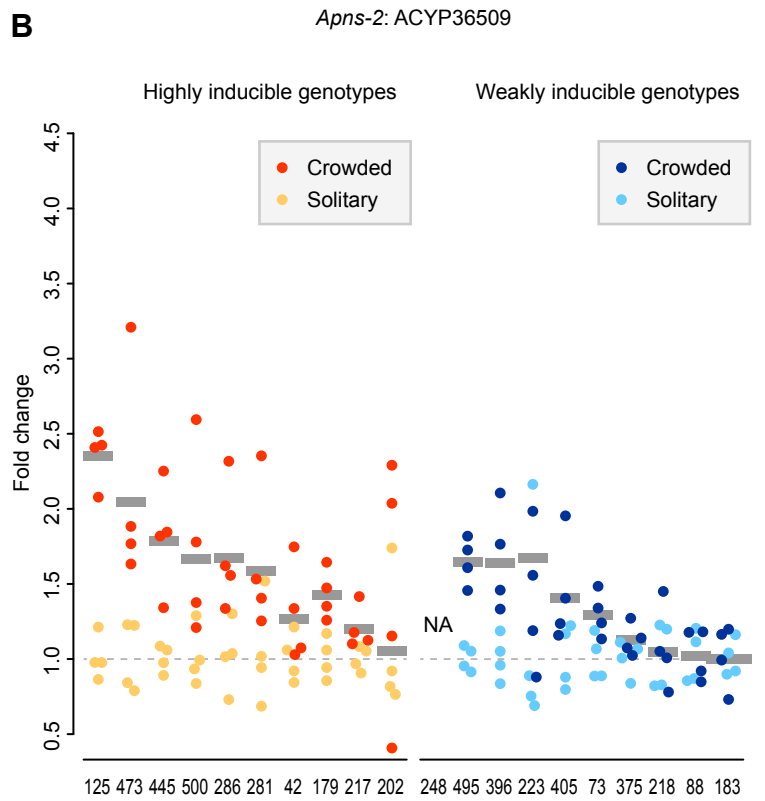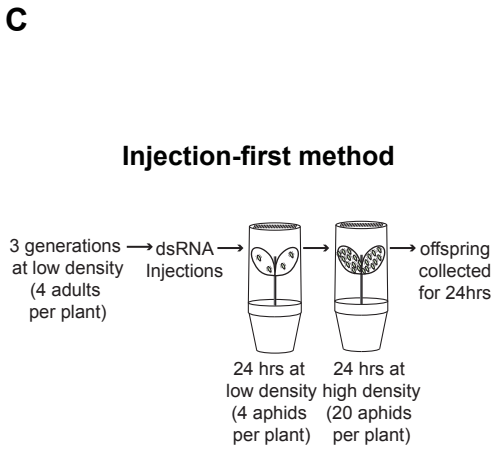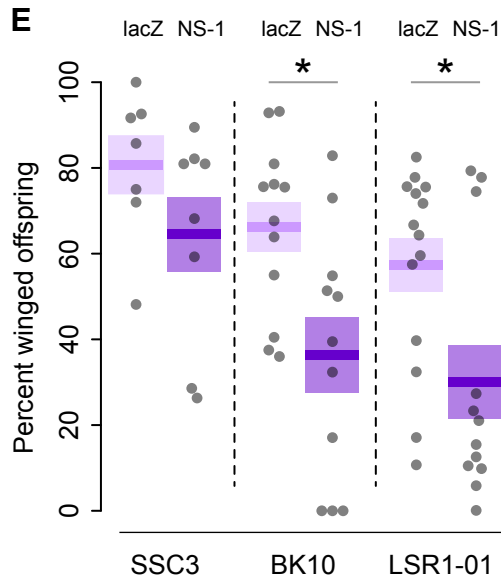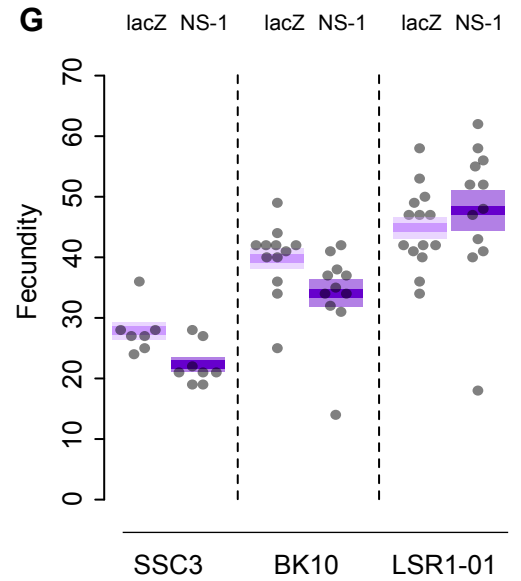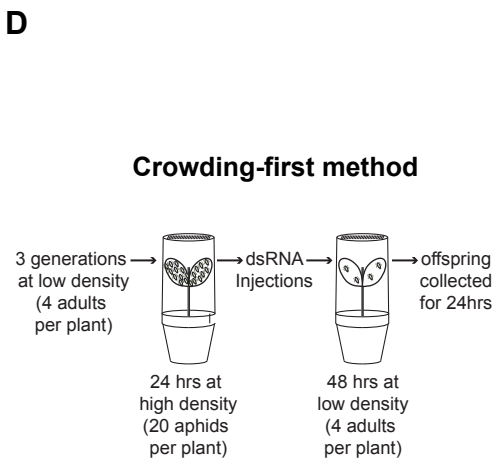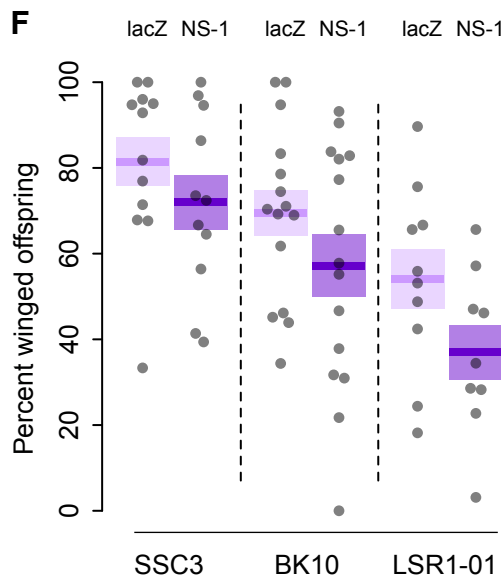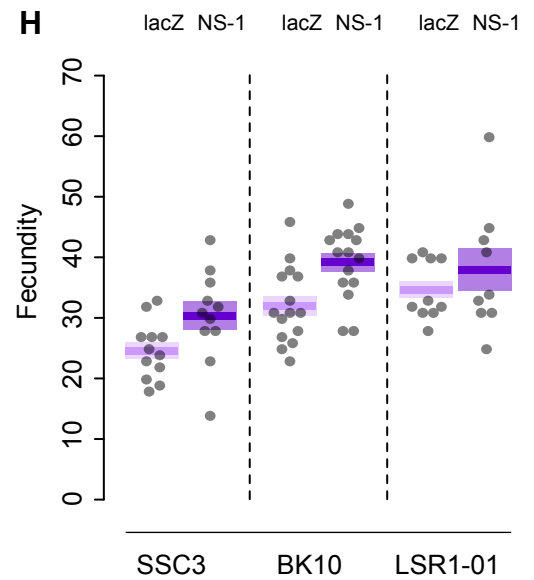

**Figure S2: Additional expression and knock-down data. Related to Figures 2A & 2B: *Apns* gene expression from quantitative PCR broken down by genotype.** Each plot shows the mean fold change in gene expression as measured by qRT-PCR in response to crowding. Each aphid genotype is shown along the x-axis, with the highly-inducible genotypes in orange to the left of each figure, and the weakly-inducible genotypes in blue to the right of the figures. Each biological replicate is shown with a point, with crowded treatment aphids in darker colors and solitary aphids in lighter colors, as indicated in the legends. The grey bars show the average differential expression of the gene in crowded versus solitary samples. **C-H: Full results from the RNAi experiments. C & D:** We performed two versions of the RNAi experiment. **C:** Injection-first method: we injected aphids with dsRNA, kept them at low density for 24 hrs, and then exposed them to high density for 24 hrs. **D:** Crowding-first method: we kept aphids at high density for 24 hrs and then injected them with dsRNA. **E & F:** Show the percent winged offspring born to aphids from the two experiments. The y-axes show the percent of winged offspring born to groups of 4 injected aphids on a single plant (each represented by a grey point). The light purple bars show the control (*lacZ* injected) treatment, the dark purple boxes show knock-down (*Apns-1* injected) aphids, with the bars around the means representing standard error. Statistical significance (at  $p < 0.0167$ ) is shown along the top of the figure with an asterisk. Aphid genotypes are shown along the bottom of the figure. Note that that C is the same data is in Figure 2G in the main text. **G & H:** Show fecundity of aphids from the two experiments. The y-axes show the number of offspring (both winged and unwinged) born to groups of 4 injected aphids as above.

Figure S3

A

```

Dysaphis      MVDVVVCDKVFNCSDIPDHIHGDGNSKNTGAQNGRRYRSDTTTDEEKTINVAEKTQLRSGVFVGRRTAEETKTTRIGE  NIDRPDFFSDGHFGEFGRGRKIRKRDLSDARRETRRANAK
Apns-2       MFGSINGFYMQEEEG -----ENSYTGEEGQDDVDSVYQYSTDTNSEC -----YGNREV -----ERGQSV
Apns-1       -----

Dysaphis      ILETRYPKFRGLHEFFRSVAVP TQQPGLCGMSAVDSISNSHVPTPMEIDKECGKFRSVNVKSAQALETDSAINPLAVASGIDNVFGKSGDGRERVVGMDEITTTDLSNDAGYRKLARETF
Apns-2       ---PRHSTFDGfq-----TEGGHSISHFSLDSFDISMAGPT-----FFHTDE-PKEMDDYEPGTRRAIGGMQHGGYSDEGENQGHVARGSPIYEHLLRRVVD -----RIRD
Apns-1       -----

Dysaphis      VRYLGSTARYVSDICVPQDREEFVQFIVDVRQLSGLSSQEQMRLVSCDHDTIHVVHTCAYSNSTCRCAWSGSAIWRNR  VARHRRRVFAADISAIEWEAIYRYFTTNGHAIQDIESGGS
Apns-2       IDFR-GNDRYISDVIVPRGPNVDEVAKEQLTMLRQFPKLPVIVTAHGDHVHCVHVCQRSNSACRCIWLQRSVLYRQH  RRRLRRRVVAIRLTSSDWE SIVRYFSTDGREPQQIDGVGS
Apns-1       -----

Dysaphis      NARLCLRLKSLQEG-GYKIPGQESVYKSVYESCRNIGRE --PPDKDQAGLDSEERSAGGY--QGEEKHEDGPGVVRVWPKTLDLLVKYPCCPPEAFYNVKEFYNNPHLNHIDDNCKKIRV
Apns-2       YGGLRDGRNFITQEVRSRRTQGPPEGNVEICVNEMPNVPRE LGAFAEHQDGN-ANHSPVDEDIGYDEGGSNIKSVCVYPTSLKNLLYQYPCCPDAFTNIKEFYLNRLNLTILEEDKCKV
Apns-1       -----

Dysaphis      ALRNWCARIREWSVSEFNDYSSGKITPYFNAYSRDKKQVYVDVQTSVQIAEELLQYQFDNDGDLLISKFLYDV  YAIVDKLVPKRNSMCVVSPSAGKNFFDVAVASYFLNYGMFGTANKT
Apns-2       ALRNWCAIIRDWSINEFVEYYNKNPVKPYFNAYARGPVTYYIDIKSVSIASELLMYQFENNGLICRFLQ  TLVNIIDKKIPKRNSMLIHSPPSAGKNYFFDAVAFAFFLNYGMFGTANKT
Apns-1       -----MYKFENNESLICRFLQ TLVNIIDKKIPKRNSMLIHSPPSAGKNYFFDAVAFAFFLNYGMFGTANKT

Dysaphis      NNFSWADGAGKRLVLWNEPNYETFHVEKIKELLGGDTTRVHVKYKGDQPLQGPPIFLLTNN  TLSICNDPAFADRLVTYEWKSAPFLKQYNKKNLPLFFYVLLTKWIKVVPNNKS
Apns-2       NNFSFSDGAGKRLVIWNEPNYEVYHLEKMKELLGGDTTRV HVKYKNDVPLQGPPIILLTN  HYLISIINDPSFKDRLSVYTWISAPFLKMYNKKLPLFFYHLLNKYNITY -----Y
Apns-1       NNFSFSDGAGKRRFCLDSVSHWNILHIAFLQ-----
    
```

B

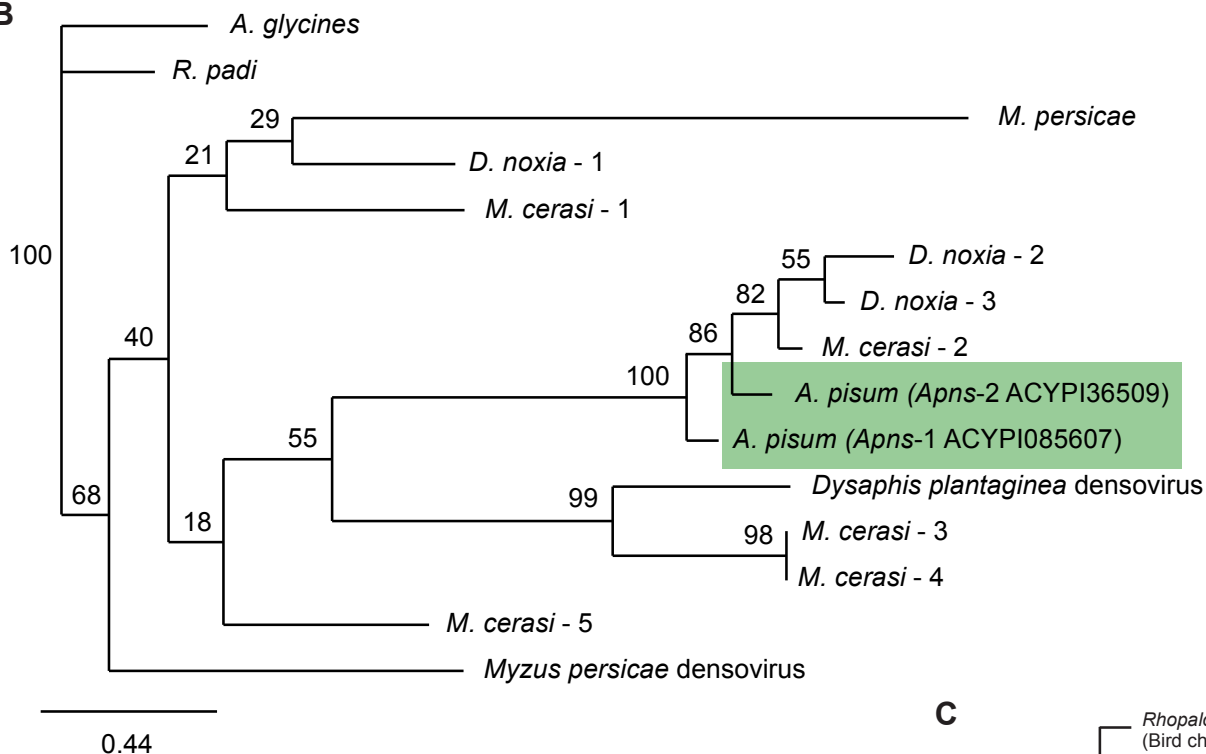

C

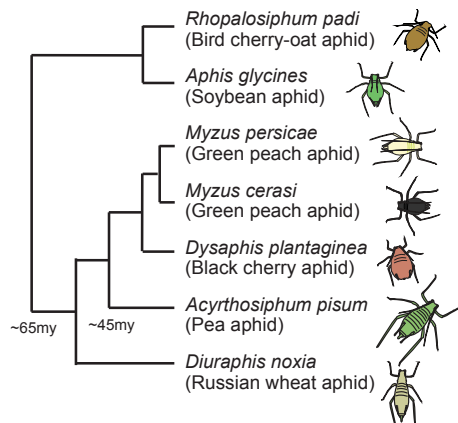

**Figure S3: Additional alignment and phylogenetics data. Related to Figure 3:** **A:** Protein alignment of the *Apns* genes and *Dysaphis plantaginea* densovirus. The alignment was made using T-Coffee [S1]. The conserved Parvovirus non-structural protein NSF superfamily domains are highlighted with bold font. **B:** Expanded phylogenetics analysis with sequences from two additional aphid species genomes, *M. cerasi* (using annotated gene sequences) and *D. noxia* (using unannotated gene sequences). Some of these sequences may be viral (e.g., *M. cerasi* sequences 3 and 4), and not aphid genome integrations. **C:** Species tree for the aphid species referred to in Figure S3B. The relationships among species are inferred from trees in Kim et al. [S2] and Hardy et al. [S3]. Divergence times are based on [S2].

| Library:  |            | Reads<br>(after QC) | Map Rate | Reads mapped<br>to an exon | Coverage per<br>base pair |
|-----------|------------|---------------------|----------|----------------------------|---------------------------|
| Phenotype | Treatment  |                     |          |                            |                           |
| Low       | Solitary A | 33,671,762          | 92.4%    | 24,260,414                 | 34.0X                     |
| Low       | Solitary B | 31,946,562          | 92.5%    | 24,153,236                 | 33.5X                     |
| Low       | Solitary C | 29,383,923          | 93.4%    | 23,422,910                 | 32.5X                     |
| Low       | Solitary D | 30,615,107          | 93.7%    | 24,522,911                 | 34.1X                     |
| Low       | Crowded A  | 31,880,792          | 93.3%    | 25,096,752                 | 34.9X                     |
| Low       | Crowded B  | 35,390,114          | 93.3%    | 29,238,732                 | 40.6X                     |
| Low       | Crowded C  | 30,851,849          | 93.1%    | 29,238,732                 | 40.6X                     |
| Low       | Crowded D  | 31,304,230          | 93.0%    | 24,397,186                 | 33.9X                     |
| High      | Solitary A | 33,541,281          | 92.4%    | 26,966,739                 | 37.5X                     |
| High      | Solitary B | 36,299,714          | 92.4%    | 29,540,256                 | 41.0X                     |
| High      | Solitary C | 32,230,382          | 92.9%    | 24,965,639                 | 34.7X                     |
| High      | Solitary D | 34,138,974          | 92.2%    | 25,912,185                 | 36.0X                     |
| High      | Crowded A  | 34,255,944          | 91.9%    | 27,296,731                 | 37.9X                     |
| High      | Crowded B  | 33,276,605          | 93.7%    | 27,586,767                 | 38.3X                     |
| High      | Crowded C  | 35,795,297          | 93.0%    | 28,104,179                 | 39.0X                     |
| High      | Crowded D  | 30,213,059          | 92.3%    | 22,958,488                 | 31.9X                     |

**Table S1. Mapping and read-calling statistics for the pooled RNAseq experiment. Related to “Pooled Gene Expression Study using RNAseq” in the STAR Methods.** The 16 RNAseq libraries are listed to the left, with the number of reads sequenced after quality control, the percentage of reads that mapped to the aphid reference genome, the number of reads that could be uniquely assigned to an exon, and the coverage per base pair shown.

| Gene ID | Annotation   | Highly-inducible genotypes                           |       | Weakly-inducible Genotypes |      | Ref. [S4]           |       |   |
|---------|--------------|------------------------------------------------------|-------|----------------------------|------|---------------------|-------|---|
|         |              | Log <sub>2</sub> FC                                  | FDR   | Log <sub>2</sub> FC        | FDR  | Log <sub>2</sub> FC | Sig ? |   |
| 1       | ACYPEI007418 | Sodium/ potassium/ calcium exchanger 3               | 2.05  | < 0.00001                  | 1.64 | < 0.00001           | 2.6   | X |
| 2       | ACYPEI066777 | Uncharacterized (riboflavin aldehyde-forming enzyme) | 2.07  | < 0.00001                  | 1.65 | < 0.00001           | 1.7   | X |
| 3       | ACYPEI003450 | Uncharacterized                                      | 1.25  | < 0.001                    | 0.82 | 0.0028              |       |   |
| 4       | ACYPEI55757  | Uncharacterized                                      | 2.49  | 0.061                      | 2.21 | < 0.001             | 1.7   | X |
| 5       | ACYPEI085607 | <i>Apns-1</i>                                        | 1.14  | < 0.001                    | 0.51 | > 0.99              | 1.7   | X |
| 6       | ACYPEI36509  | <i>Apns-2</i>                                        | 1.25  | 0.020                      | 0.72 | > 0.99              |       |   |
| 7       | ACYPEI000986 | Glucose dehydrogenase                                | -0.94 | 0.049                      | 0.06 | > 0.99              |       |   |
| 8       | ACYPEI087498 | Uncharacterized                                      | -1.87 | 0.058                      | 0.09 | > 0.99              |       |   |
| 9       | ACYPEI063882 | Uncharacterized                                      | 1.44  | 0.071                      | 0.49 | > 0.99              |       |   |
| 10      | ACYPEI082575 | Uncharacterized (thaumatin-like protein)             | 1.23  | 0.071                      | 0.28 | > 0.99              | 2.7   | X |
| 11      | ACYPEI32040  | Uncharacterized                                      | -2.92 | 0.071                      | 0.01 | > 0.99              |       |   |
| 12      | ACYPEI006346 | Uncharacterized                                      | -0.67 | 0.071                      | 0.06 | > 0.99              |       |   |
| 13      | ACYPEI000458 | Uncharacterized                                      | 0.81  | 0.074                      | 0.59 | > 0.99              |       |   |

**Table S2. Differentially expressed genes in highly- and weakly-inducible pooled genotypes form RNAseq. Related to “Pooled Gene Expression Study using RNAseq” in the STAR Methods.** The aphid genome gene ID (ACYPEI) number (<https://bipaa.genouest.org/is/aphidbase/>) is given to the left of the figure along with the gene annotation. The log<sub>2</sub> Fold Change and False Discovery Rate (FDR) values are given for highly- and then weakly-inducible genotypes for each differentially expressed gene. At the right of the table, the log<sub>2</sub> Fold Change measured by a previous RNAseq study of a highly-inducible genotype is given, along with an X if the gene was significantly differentially expressed in response to crowding in that study.

| Sequence name                                       | Sequence ID and origin                    |
|-----------------------------------------------------|-------------------------------------------|
| Ambidensovirus                                      | AWV66976.1 (Genbank)                      |
| Psyllid densovirus                                  | YP_009256211.1 (Genbank)                  |
| Silkworm densovirus                                 | NP_694834.1 (Genbank)                     |
| Mosquito densovirus                                 | YP_002887625.1 (Genbank)                  |
| Cockroach densovirus                                | NP_051020.1 (Genbank)                     |
| Crayfish densovirus                                 | YP_009134732.1 (Genbank)                  |
| Seastar densovirus                                  | YP_009507340.1 (Genbank)                  |
| <i>Myzus persicae</i> densovirus                    | NP_874376.1 (Genbank)                     |
| <i>Dysaphis plantaginea</i> densovirus              | ACG50803.1 (Genbank)                      |
| Bird cherry-oat aphid ( <i>Rhopalosiphum padi</i> ) | Rpa20011.t1 (Aphidbase)                   |
| Soybean aphid ( <i>Aphis glycines</i> )             | AG004882-RA (Aphidbase)                   |
| Green peach aphid ( <i>Myzus persicae</i> )         | MYZPE13164_0_v1.0_000125320.4 (Aphidbase) |
| Russian wheat aphid ( <i>Diuraphis noxia</i> ) – 1  | JOTR01000921                              |
| Russian wheat aphid ( <i>Diuraphis noxia</i> ) – 2  | JOTR01000437                              |
| Russian wheat aphid ( <i>Diuraphis noxia</i> ) – 3  | JOTR010000290                             |
| Black cherry aphid ( <i>Myzus cerasi</i> ) – 1      | Mca20013                                  |
| Black cherry aphid ( <i>Myzus cerasi</i> ) – 2      | Mca20257                                  |
| Black cherry aphid ( <i>Myzus cerasi</i> ) – 3      | Mca22591                                  |
| Black cherry aphid ( <i>Myzus cerasi</i> ) – 4      | Mca22592                                  |
| Black cherry aphid ( <i>Myzus cerasi</i> ) – 5      | Mca23530                                  |

**Table S3. Densovirus genes and densovirus derived gene homologs. Related to Figure 3.** Source of sequence information for the phylogenetics work, for both densoviral and viral-inserted aphid genes. The sequence names that corresponds with Figures 3A, 3B, and S3B are listed to the left, and the ID number and source are listed to the right.



## SUPPLEMENTAL REFERENCES

- S1. Notredame, C., Higgins, D.G., and Heringa, J. (2000) T-Coffee: A novel method for fast and accurate multiple sequence alignment. *J. Mol. Biol.* 302:205–17.
- S2. Kim, H., Lee, S., and Jang, Y. (2011). Macroevo-lutionary patterns in the Aphidini aphids (Hemiptera: Aphididae): diversification, host association, and biogeographic origins. *PLoS One.* 6:e24749.
- S3. Hardy, N.B., Peterson, D.A., and von Dohlen, C.D. (2015). The evolution of life cycle complexity in aphids: Ecological optimization or historical constraint? *Evolution.* 69:1423–32.
- S4. Vellichirammal, N.N., Madayiputhiya, N., and Brisson, J.A. (2016). The genomewide transcriptional response underlying the pea aphid wing polyphenism. *Mol. Ecol.* 25:4146–60.
